# Supplementary material for: Nuclease activity and anti-proliferative effect on human cancerous cells of a newly synthesized and characterized mononuclear copper(ii) complex [CuII(L)(fu)2] [L = 2-(2-pyridyl)benzimidazole, fu = furoate]
Source: Royal Society of Chemistry journal article supplement (doi:10.1039/c4ra09448d), 2014-11-14
Supplement: c4ra09448d1.pdf [file c4ra09448d1.pdf]

## Electronic Supplementary Information

Nuclease activity and anti-proliferative effect on human cancerous cells of a newly synthesized and characterized mononuclear copper(II) complex  $[\text{Cu}^{\text{II}}(\text{L})(\text{fu})_2]$  [ $\text{L} = 2$ -(2-pyridyl)benzimidazole, fu = furoate]

Sunit Kumar Mal,<sup>a</sup> Merry Mitra,<sup>a</sup> Gurpreet Kaur,<sup>b</sup> V. M. Manikandamathavan,<sup>c</sup> Manikantan Syamala Kiran,<sup>d</sup> Angshuman Roy Choudhury,<sup>b</sup> Balachandran Unni Nair\*<sup>c</sup> and Rajarshi Ghosh\*<sup>a</sup>

<sup>a</sup> Department of Chemistry, The University of Burdwan, Burdwan 713 104, India. Fax: +91-342-2530452; Tel: +91 342 2533913 ext: 424; E-mail: rajarshi\_chem@yahoo.co.in.

<sup>b</sup> Department of Chemical Sciences, Indian Institute of Science Education & Research, Mohali, Sector 81, S.A.S. Nagar, Knowledge City, Manauli PO, Mohali 140 306, India

<sup>c</sup> Chemical Laboratory, CSIR-Central Leather Research Institute, Adayar, Chennai 600 020, India. E-mail: bunair@clri.res.in.

<sup>d</sup> Bio-Materials Laboratory, CSIR-Central Leather Research Institute, Adayar, Chennai 600 020, India

Fig. S1.....  $^1\text{H}$  NMR spectrum of L

Fig. S2..... Cell viability on MTT assay with Cisplatin

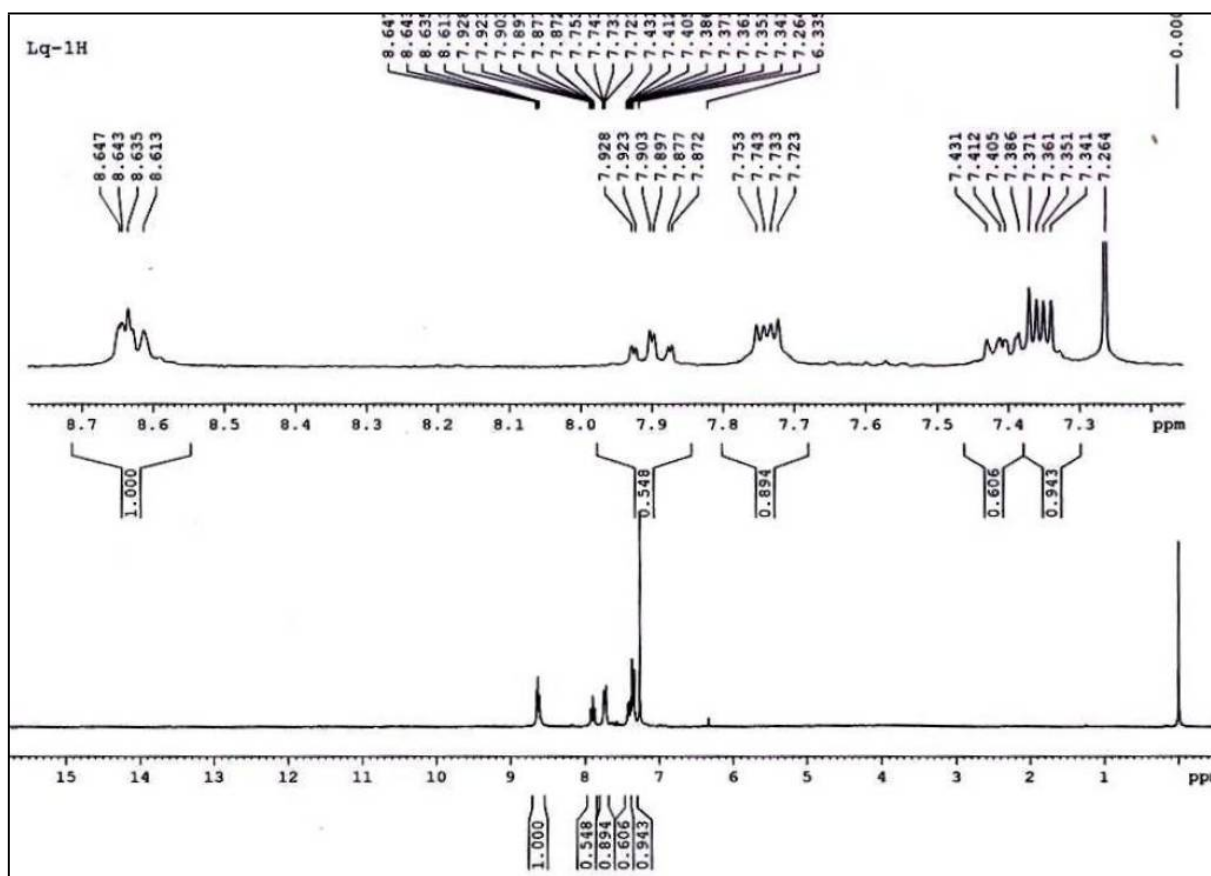

**Fig. S1**  $^1\text{H}$  NMR spectrum of L

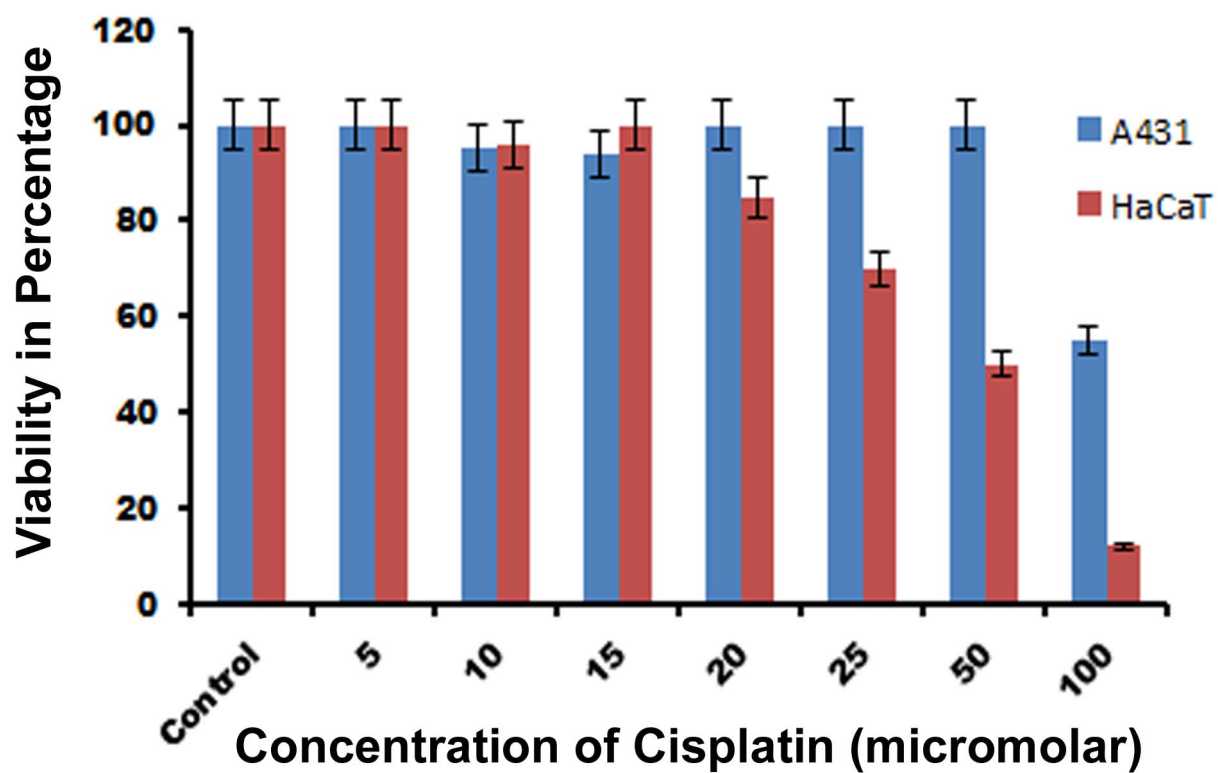

**Fig. S2** Cell viability on MTT assay with *Cis*-platin
